# Supplementary material for: Mannan-oligosaccharides promote gut microecological recovery after antibiotic disturbance
Source: Royal Society of Chemistry journal article supplement (doi:10.1039/d4fo00332b), 2024-01-01

# Electronic Supplementary Material (ESI) for Food & Function.

This journal is © The Royal Society of Chemistry 2024

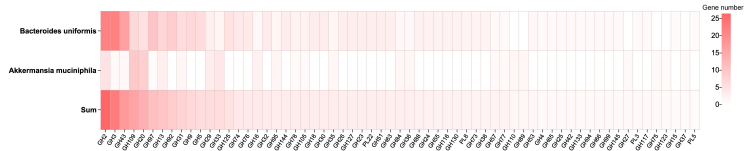

Supplement: d4fo00332b2.pdf [file d4fo00332b2.pdf]
