# Supplementary figures and images for: Mannan-oligosaccharides promote gut microecological recovery after antibiotic disturbance
Source: Royal Society of Chemistry journal article supplement (doi:10.1039/d4fo00332b), 2024-01-01

A

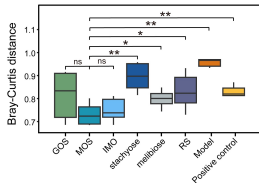

B

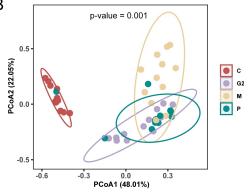

Supplement: d4fo00332b3.pdf [file d4fo00332b3.pdf]

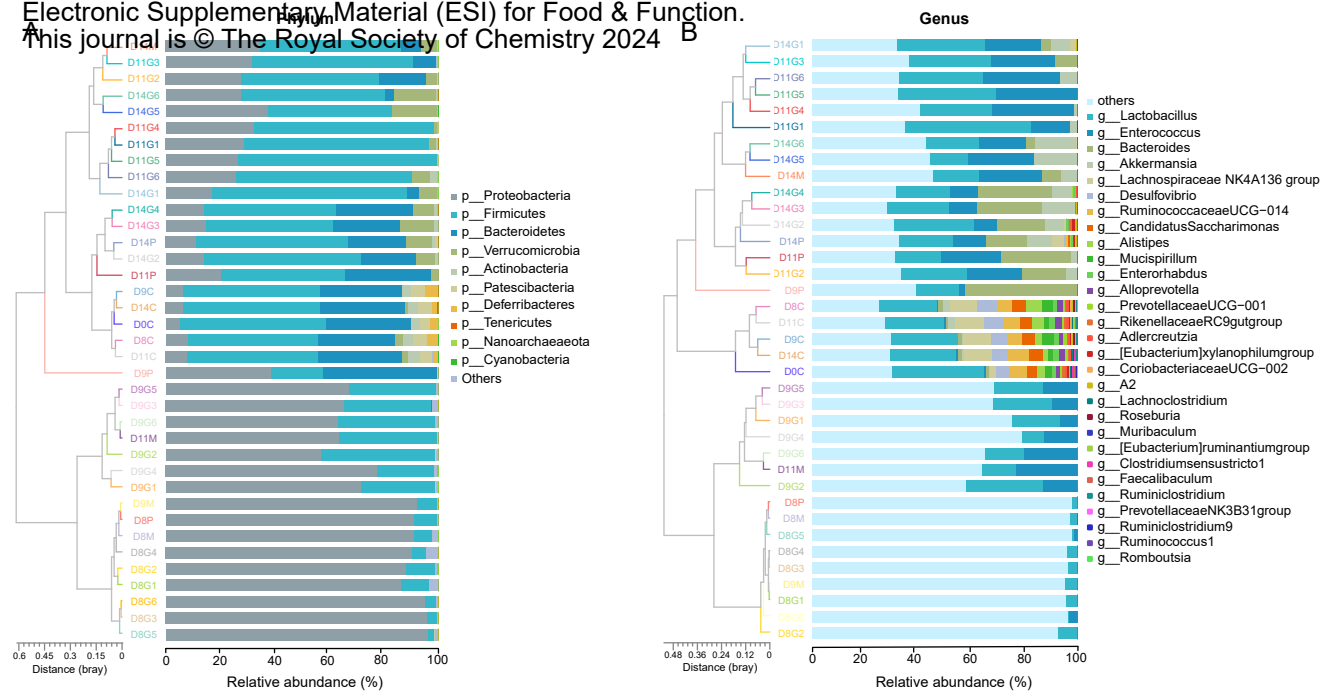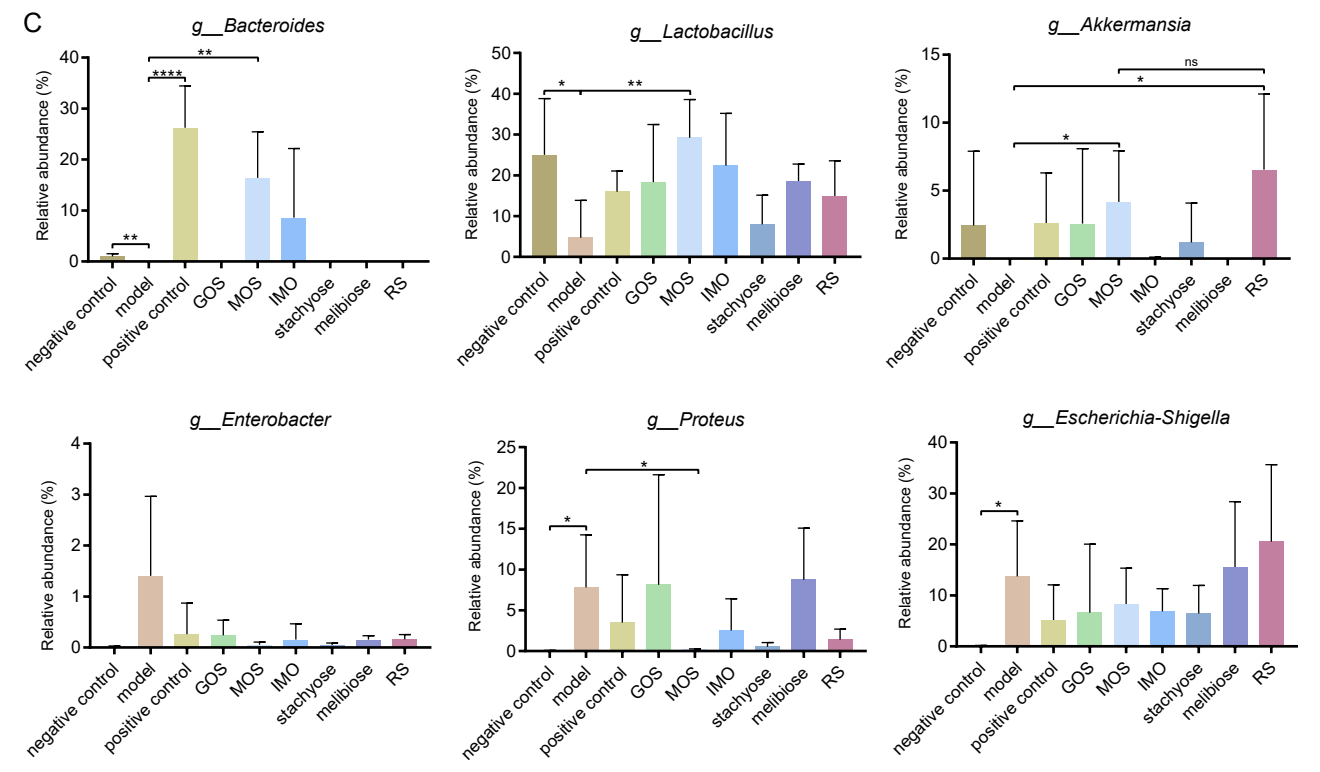

Supplement: d4fo00332b4.pdf [file d4fo00332b4.pdf]

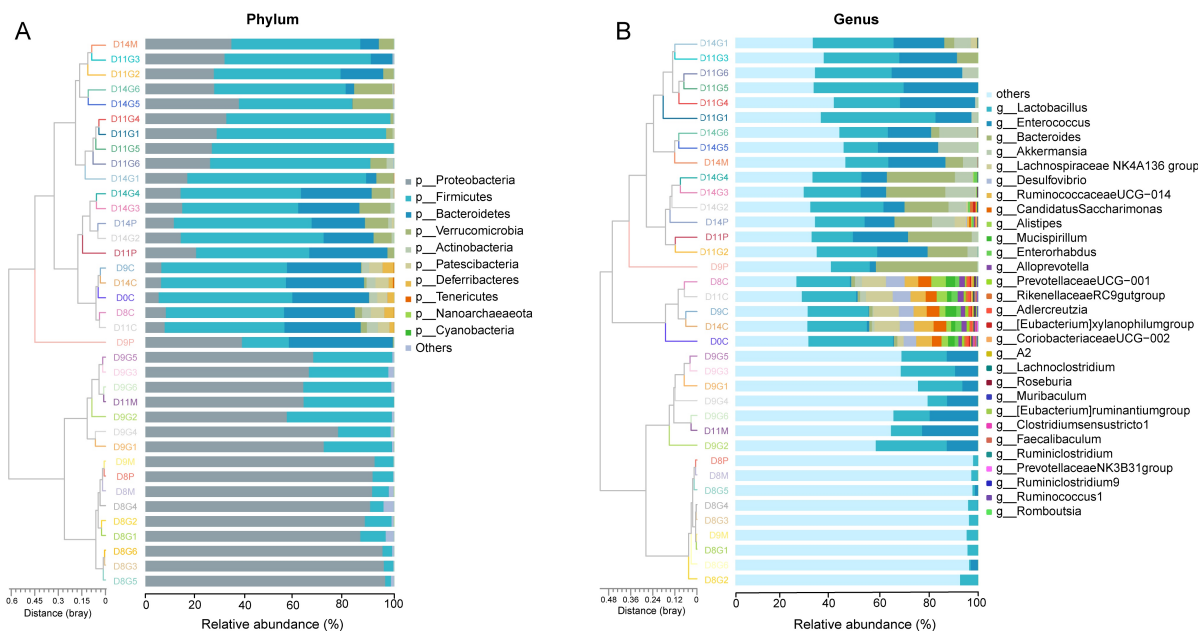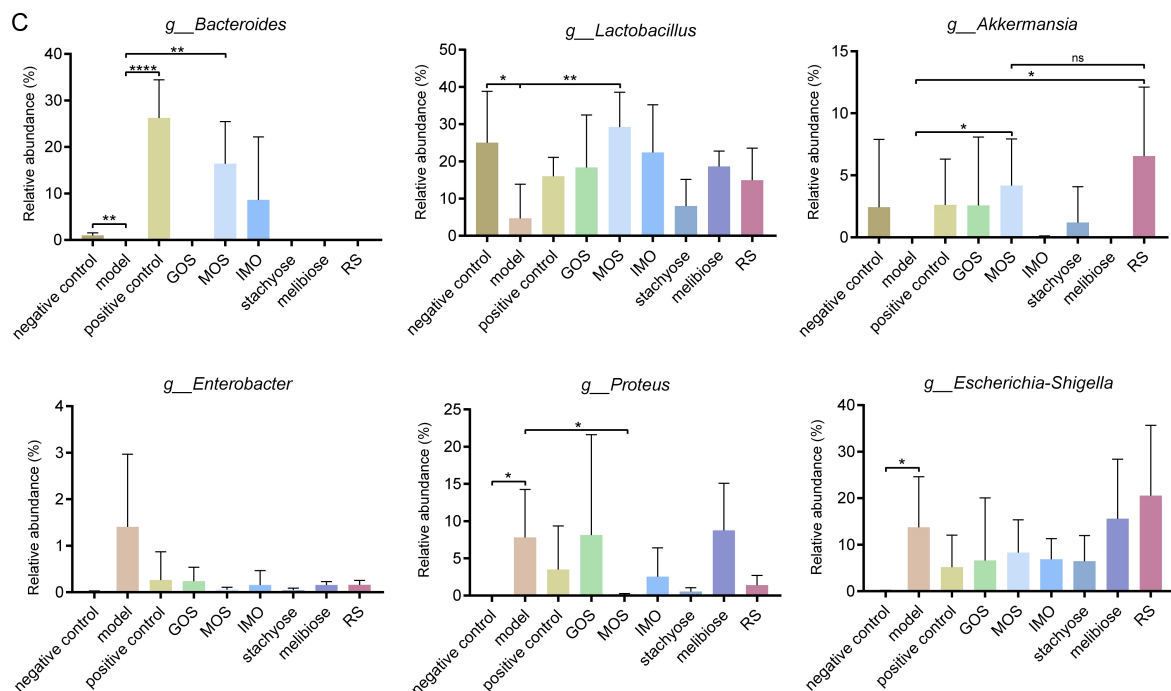

Supplement: d4fo00332b5.pdf [file d4fo00332b5.pdf]

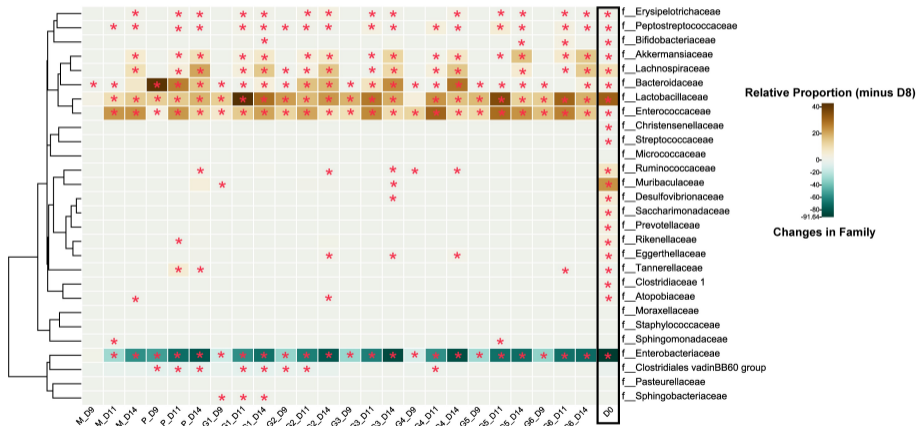

Supplement: d4fo00332b6.pdf [file d4fo00332b6.pdf]

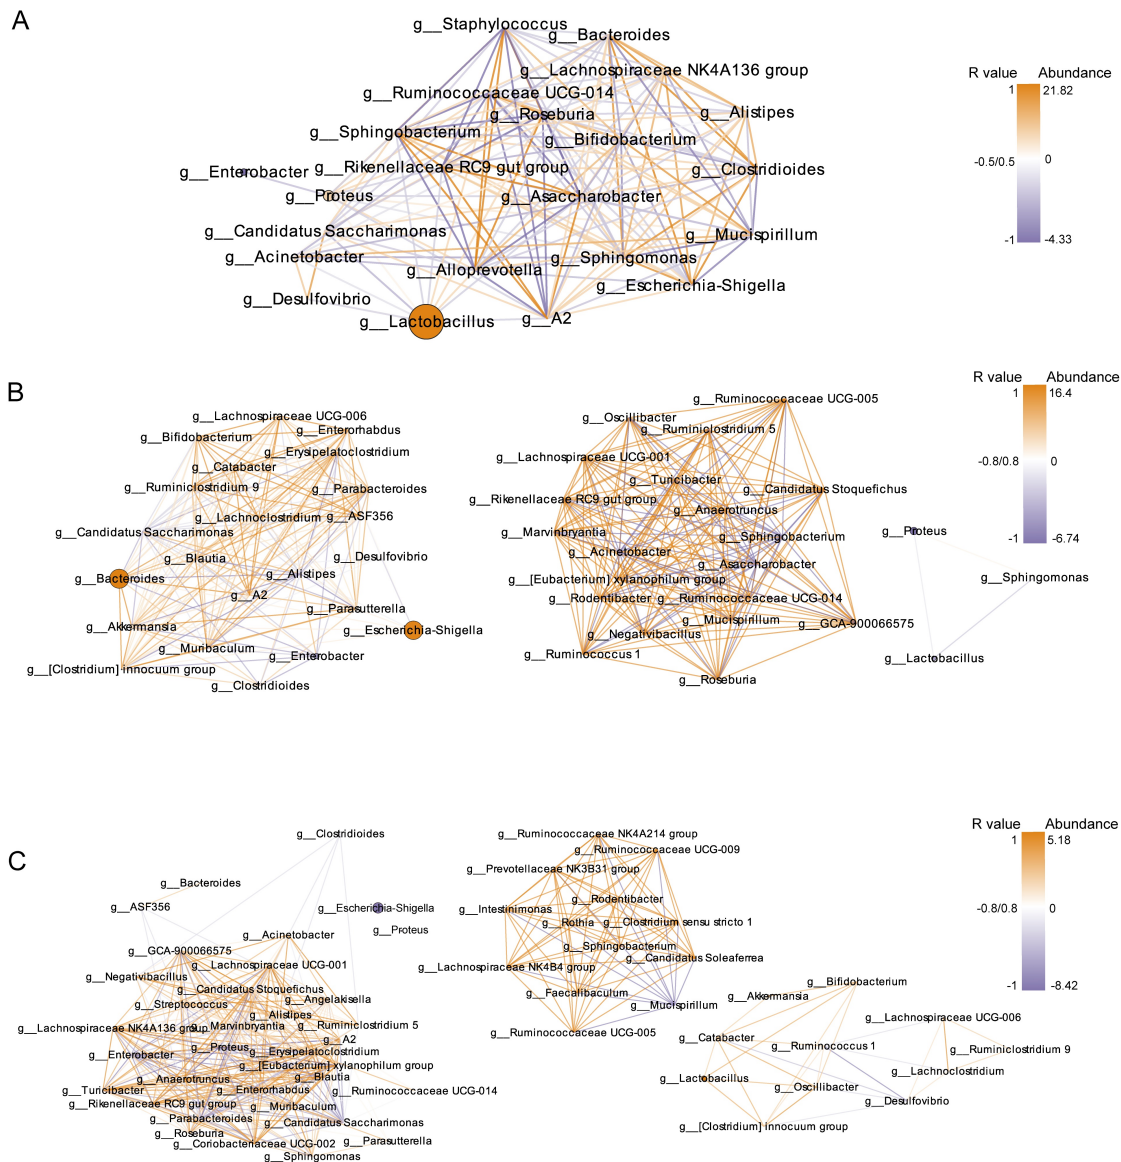

Supplement: d4fo00332b7.pdf [file d4fo00332b7.pdf]

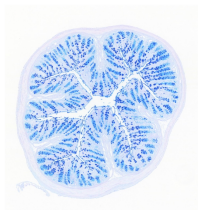

C

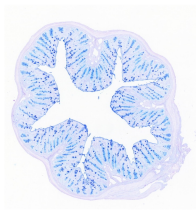

M

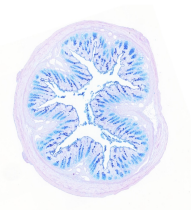

P

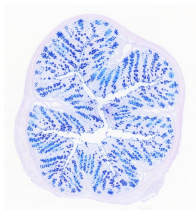

G1

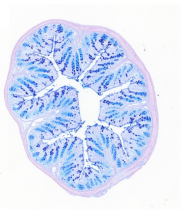

G2

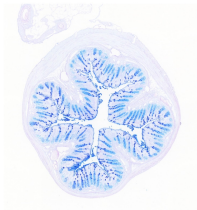

G3

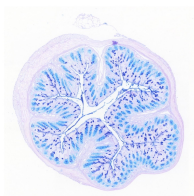

G4

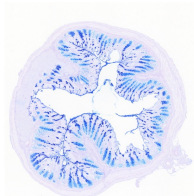

G5

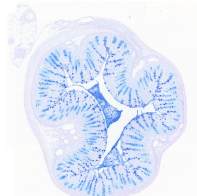

G6

Supplement: d4fo00332b8.pdf [file d4fo00332b8.pdf]

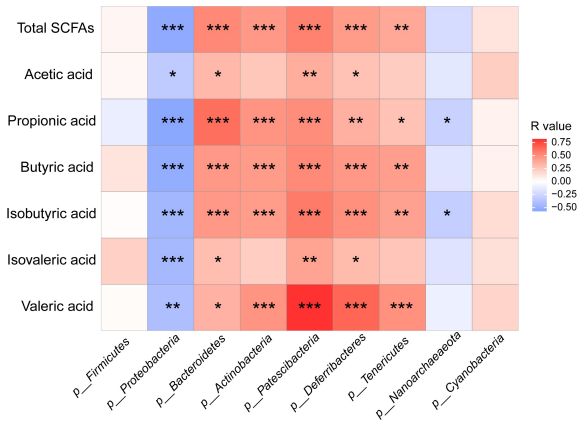

Supplement: d4fo00332b9.pdf [file d4fo00332b9.pdf]
